# Supplementary material
Source: PubMed Central journal article supplement (PMC3296041)
Supplement: mmc1.pdf [file mmc1.pdf]

## SUPPORTING MATERIAL

### Epinephrine Modulates BCAM/Lu and ICAM-4 Expression on the Sickle Cell Trait Red Blood Cell Membrane

Jamie L. Maciaszek<sup>†</sup>, Biree Andemariam<sup>‡</sup>, Greg Huber<sup>§</sup>, and George Lykotrafitis<sup>†\*</sup>

<sup>†</sup>*Department of Mechanical Engineering, University of Connecticut, Storrs, CT, USA,*  
<sup>‡</sup>*Department of Medicine, Division of Hematology Oncology, University of Connecticut Health Center, Farmington, CT, USA,* <sup>§</sup>*Richard Berlin Center for Cell Analysis & Modeling and Department of Cell Biology, University of Connecticut Health Center, Farmington, CT, USA*

#### Supporting Figures

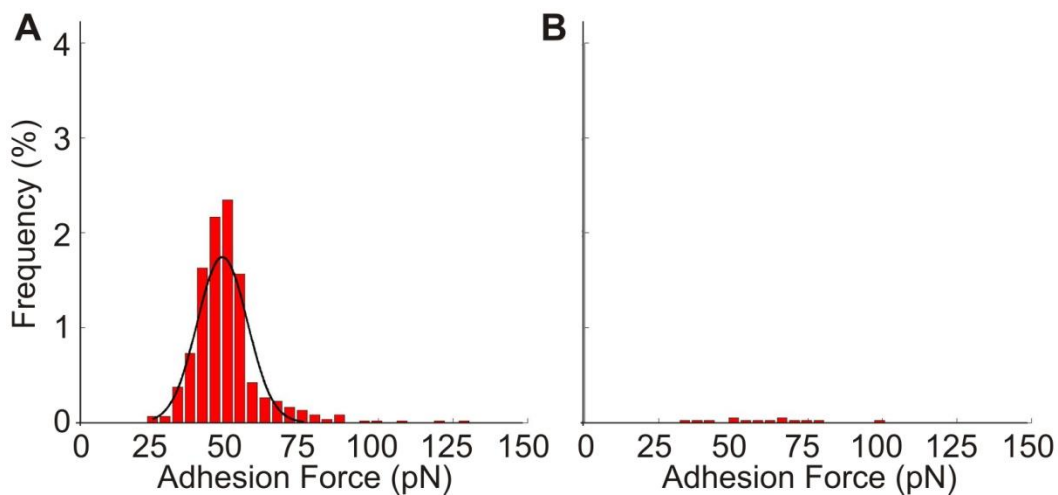

**Figure S1.** Validation of the specificity of the BCAM/Lu-laminin interaction on wild-type RBCs. (A) Adhesion force histogram obtained from 6,144 force curves ( $n = 6$  cells  $\times$  1024 force curves) measured between a LAMA5 tip and a wild-type RBC. The distribution of adhesion forces reveals a maximum value at  $46 \pm 6$  pN, as determined by a Gaussian fit. (B) Adhesion force histogram ( $n = 6$  cells  $\times$  1024 force curves) obtained after injection of free laminin (250  $\mu\text{g}/\text{mL}$ ) into solution. Force-distance curves were measured in a LAMA5 tip and a wild-type RBC. The dramatic reduction of adhesion frequency to 0.52% from 10.42% on the wild-type in (A) ( $p < 0.001$ ) demonstrates the specificity of the BCAM/Lu-laminin interaction.
